# Supplementary material
Source: PubMed Central journal article supplement (PMC6361392)
Supplement: NIHMS1001768-supplement-Supplementary_Information.pdf [file NIHMS1001768-supplement-Supplementary_Information.pdf]

Polyphasic characterization of four soil-derived phenanthrene-degrading *Acidovorax* strains and  
proposal of *Acidovorax carolinensis* sp. nov.

David R. Singleton, Janice Lee, Allison N. Dickey, Aaron Stroud,  
Elizabeth H. Scholl, Fred A. Wright, and Michael D. Aitken

**Supplementary Information**

**Table A.1.** Genome blast distance phylogeny values for all publicly available *Acidovorax* genomes to strains described in this work.

| Species              | Strain                  | NA2  |                |               | NA3 <sup>T</sup> |                |                | P3   |                |                | P4   |                |                |
|----------------------|-------------------------|------|----------------|---------------|------------------|----------------|----------------|------|----------------|----------------|------|----------------|----------------|
|                      |                         | DDH  | Model C.I.     | Prob DDH ≥70% | DDH              | Model C.I.     | Prob. DDH ≥70% | DDH  | Model C.I.     | Prob. DDH ≥70% | DDH  | Model C.I.     | Prob. DDH ≥70% |
| <b>sp.</b>           | NA2                     | 100  | [100 - 100%]   | 98.3          | 72.4             | [69.4 - 75.2%] | 82.24          | 75.5 | [72.5 - 78.3%] | 86.38          | 75.7 | [72.7 - 78.5%] | 86.56          |
| <b>sp.</b>           | NA3 <sup>T</sup>        | 72.4 | [69.4 - 75.2%] | 82.2          | 100              | [100 - 100%]   | 98.30          | 73.2 | [70.2 - 76%]   | 83.46          | 73.3 | [70.3 - 76.2%] | 83.63          |
| <b>sp.</b>           | P3                      | 75.5 | [72.5 - 78.3%] | 86.4          | 73.2             | [70.2 - 76.0%] | 83.46          | 100  | [100 - 100%]   | 98.30          | 98.3 | [97.5 - 98.8%] | 97.91          |
| <b>sp.</b>           | P4                      | 75.7 | [72.7 - 78.5%] | 86.6          | 73.3             | [70.3 - 76.2%] | 83.63          | 98.3 | [97.5 - 98.8%] | 97.91          | 100  | [100 - 100%]   | 98.30          |
| <i>acенае</i>        | T10_61                  | 22.4 | [20.1 - 24.8%] | 0.00          | 22.4             | [20.1 - 24.8%] | 0.00           | 22.4 | [20.1 - 24.9%] | 0.00           | 22.4 | [20.1 - 24.9%] | 0.00           |
| <i>avenae</i>        | ATCC 19860 <sup>T</sup> | 22.4 | [20.1 - 24.8%] | 0.00          | 22.3             | [20.0 - 24.7%] | 0.00           | 22.3 | [20.0 - 24.8%] | 0.00           | 22.3 | [20.1 - 24.8%] | 0.00           |
| <i>acенае</i>        | RS-1                    | 22.4 | [20.1 - 24.9%] | 0.00          | 22.4             | [20.1 - 24.8%] | 0.00           | 22.6 | [20.3 - 25.0%] | 0.00           | 22.6 | [20.3 - 25.0%] | 0.00           |
| <i>caeni</i>         | R-24608 <sup>T</sup>    | 22.2 | [19.9 - 24.6%] | 0.00          | 22.3             | [20.0 - 24.7%] | 0.00           | 22.4 | [20.1 - 24.8%] | 0.00           | 22.4 | [20.1 - 24.8%] | 0.00           |
| <i>cattleyae</i>     | DSM 17101               | 22.1 | [19.8 - 24.5%] | 0.00          | 22.0             | [19.7 - 24.4%] | 0.00           | 22.1 | [19.9 - 24.6%] | 0.00           | 22.1 | [19.9 - 24.6%] | 0.00           |
| <i>citruilli</i>     | AAC00-1                 | 22.3 | [20.0 - 24.7%] | 0.00          | 22.3             | [20.1 - 24.8%] | 0.00           | 22.4 | [20.1 - 24.8%] | 0.00           | 22.4 | [20.1 - 24.8%] | 0.00           |
| <i>citruilli</i>     | DSM 17060               | 22.2 | [20.0 - 24.7%] | 0.00          | 22.2             | [19.9 - 24.6%] | 0.00           | 22.3 | [20.0 - 24.7%] | 0.00           | 22.3 | [20.0 - 24.7%] | 0.00           |
| <i>citruilli</i>     | M6                      | 22.2 | [19.9 - 24.7%] | 0.00          | 22.2             | [19.9 - 24.6%] | 0.00           | 22.3 | [20.0 - 24.7%] | 0.00           | 22.3 | [20.0 - 24.7%] | 0.00           |
| <i>citruilli</i>     | pslb65                  | 22.2 | [20.0 - 24.7%] | 0.00          | 22.2             | [19.9 - 24.6%] | 0.00           | 22.3 | [20.0 - 24.7%] | 0.00           | 22.3 | [20.0 - 24.7%] | 0.00           |
| <i>citruilli</i>     | tw6                     | 22.3 | [20.0 - 24.7%] | 0.00          | 22.3             | [20.0 - 24.7%] | 0.00           | 22.3 | [20.1 - 24.8%] | 0.00           | 22.3 | [20.1 - 24.8%] | 0.00           |
| <i>citruilli</i>     | ZJU1106                 | 24.0 | [21.7 - 26.5%] | 0.00          | 24.0             | [21.6 - 26.4%] | 0.00           | 24.0 | [21.7 - 26.4%] | 0.00           | 24.0 | [21.7 - 26.4%] | 0.00           |
| <i>delafieldii</i>   | 2AN                     | 30.0 | [27.6 - 32.5%] | 0.11          | 29.9             | [27.6 - 32.4%] | 0.10           | 30.0 | [27.7 - 32.6%] | 0.11           | 30.0 | [27.7 - 32.5%] | 0.11           |
| <i>delafieldii</i>   | CCH3-G3                 | 26.1 | [23.8 - 28.6%] | 0.02          | 26.0             | [23.7 - 28.5%] | 0.02           | 26.6 | [24.3 - 29.1%] | 0.02           | 26.6 | [24.3 - 29.1%] | 0.02           |
| <i>delafieldii</i>   | CCH4-A2                 | 18.0 | [15.9 - 20.4%] | 0.00          | 16.8             | [14.7 - 19.1%] | 0.00           | 17.3 | [15.2 - 19.6%] | 0.00           | 17.3 | [15.2 - 19.6%] | 0.00           |
| <i>ebreus</i>        | TPSY                    | 22.4 | [20.1 - 24.8%] | 0.00          | 22.6             | [20.3 - 25.0%] | 0.00           | 22.4 | [20.2 - 24.9%] | 0.00           | 22.4 | [20.2 - 24.9%] | 0.00           |
| <i>konjaci</i>       | DSM 7481 <sup>T</sup>   | 22.1 | [19.8 - 24.5%] | 0.00          | 22.2             | [20.0 - 24.7%] | 0.00           | 22.2 | [19.9 - 24.6%] | 0.00           | 22.2 | [19.9 - 24.6%] | 0.00           |
| <i>oryzae</i>        | ATCC 19882 <sup>T</sup> | 22.2 | [19.9 - 24.7%] | 0.00          | 22.3             | [20.0 - 24.7%] | 0.00           | 22.3 | [20.0 - 24.7%] | 0.00           | 22.3 | [20.0 - 24.7%] | 0.00           |
| <i>radicis</i>       | N35 <sup>T</sup>        | 25.9 | [23.5 - 28.3%] | 0.01          | 26.0             | [23.6 - 28.5%] | 0.02           | 26.0 | [23.7 - 28.5%] | 0.02           | 26.0 | [23.7 - 28.5%] | 0.02           |
| <i>radicis</i>       | N35v                    | 25.9 | [23.5 - 28.3%] | 0.01          | 26.0             | [23.6 - 28.5%] | 0.02           | 26.0 | [23.7 - 28.5%] | 0.02           | 26.0 | [23.7 - 28.5%] | 0.02           |
| <i>solii</i>         | DSM 25157               | 34.0 | [31.6 - 36.5%] | 0.47          | 33.8             | [31.4 - 36.3%] | 0.44           | 34.2 | [31.8 - 36.7%] | 0.51           | 34.2 | [31.8 - 36.7%] | 0.51           |
| <i>temperans</i>     | KY4                     | 24.0 | [21.7 - 26.5%] | 0.01          | 24.2             | [21.9 - 26.6%] | 0.01           | 24.3 | [22.0 - 26.7%] | 0.01           | 24.3 | [22.0 - 26.7%] | 0.01           |
| <i>valerianellae</i> | DSM 16619               | 22.6 | [20.3 - 25.1%] | 0.00          | 22.7             | [20.5 - 25.2%] | 0.00           | 22.7 | [20.4 - 25.1%] | 0.00           | 22.7 | [20.4 - 25.1%] | 0.00           |

| Species          | Strain     | NA2  |                |               | NA3 <sup>T</sup> |                |                | P3   |                |                | P4   |                |                |
|------------------|------------|------|----------------|---------------|------------------|----------------|----------------|------|----------------|----------------|------|----------------|----------------|
|                  |            | DDH  | Model C.I.     | Prob DDH ≥70% | DDH              | Model C.I.     | Prob. DDH ≥70% | DDH  | Model C.I.     | Prob. DDH ≥70% | DDH  | Model C.I.     | Prob. DDH ≥70% |
| <i>wautersii</i> | DSM 27981  | 23.3 | [21.0 - 25.7%] | 0.00          | 23.1             | [20.8 - 25.6%] | 0.00           | 23.4 | [21.1 - 25.8%] | 0.00           | 23.3 | [21.0 - 25.8%] | 0.00           |
| sp.              | 65-7       | 25.7 | [23.4 - 28.2%] | 0.01          | 25.9             | [23.6 - 28.4%] | 0.01           | 25.9 | [23.6 - 28.4%] | 0.01           | 25.9 | [23.6 - 28.4%] | 0.01           |
| sp.              | 12322-1    | 20.3 | [18.1 - 22.7%] | 0.00          | 20.6             | [18.4 - 23.1%] | 0.00           | 20.6 | [18.3 - 23.0%] | 0.00           | 20.6 | [18.3 - 23.0%] | 0.00           |
| sp.              | 121606     | 20.1 | [17.9 - 22.5%] | 0.00          | 20.4             | [18.2 - 22.8%] | 0.00           | 20.4 | [18.2 - 22.8%] | 0.00           | 20.4 | [18.1 - 22.8%] | 0.00           |
| sp.              | 202149     | 20.1 | [17.9 - 22.6%] | 0.00          | 20.4             | [18.2 - 22.8%] | 0.00           | 20.4 | [18.2 - 22.8%] | 0.00           | 20.4 | [18.2 - 22.8%] | 0.00           |
| sp.              | CCH12-A4   | 24.8 | [22.4 - 27.2%] | 0.01          | 24.7             | [22.4 - 27.2%] | 0.01           | 26.2 | [23.9 - 28.7%] | 0.02           | 26.3 | [23.9 - 28.8%] | 0.02           |
| sp.              | CF316      | 25.1 | [22.8 - 27.6%] | 0.01          | 25.3             | [22.9 - 27.7%] | 0.01           | 25.3 | [23.0 - 27.8%] | 0.01           | 25.3 | [23.0 - 27.8%] | 0.01           |
| sp.              | GW101-3H11 | 26.1 | [23.7 - 28.6%] | 0.02          | 26.0             | [23.7 - 28.5%] | 0.02           | 26.1 | [23.7 - 28.6%] | 0.02           | 26.1 | [23.7 - 28.6%] | 0.02           |
| sp.              | JHL-3      | 35.1 | [32.6 - 37.6%] | 0.67          | 34.9             | [32.5 - 37.4%] | 0.64           | 35.3 | [32.9 - 37.8%] | 0.73           | 35.3 | [32.9 - 37.8%] | 0.73           |
| sp.              | JHL-9      | 34.5 | [32.1 - 37.1%] | 0.57          | 34.5             | [32.1 - 37.0%] | 0.56           | 34.7 | [32.3 - 37.2%] | 0.60           | 34.7 | [32.3 - 37.2%] | 0.60           |
| sp.              | JS42       | 23.1 | [20.8 - 25.6%] | 0.00          | 23.4             | [21.1 - 25.8%] | 0.00           | 24.1 | [21.8 - 26.6%] | 0.01           | 24.1 | [21.8 - 26.6%] | 0.01           |
| sp.              | KKS102     | 25.9 | [23.5 - 28.4%] | 0.01          | 26.1             | [23.8 - 28.6%] | 0.02           | 25.9 | [23.6 - 28.4%] | 0.01           | 25.9 | [23.6 - 28.4%] | 0.01           |
| sp.              | Leaf76     | 26.0 | [23.7 - 28.5%] | 0.02          | 25.9             | [23.5 - 28.4%] | 0.01           | 25.9 | [23.6 - 28.4%] | 0.02           | 25.9 | [23.6 - 28.4%] | 0.02           |
| sp.              | Leaf78     | 25.8 | [23.5 - 28.3%] | 0.01          | 25.7             | [23.4 - 28.2%] | 0.01           | 25.8 | [23.4 - 28.3%] | 0.01           | 25.8 | [23.4 - 28.2%] | 0.01           |
| sp.              | Leaf84     | 26.0 | [23.7 - 28.5%] | 0.02          | 25.9             | [23.5 - 28.4%] | 0.01           | 25.9 | [23.6 - 28.4%] | 0.01           | 25.9 | [23.6 - 28.4%] | 0.01           |
| sp.              | Leaf160    | 22.8 | [20.5 - 25.3%] | 0.00          | 22.9             | [20.6 - 25.3%] | 0.00           | 22.8 | [20.5 - 25.2%] | 0.00           | 22.8 | [20.5 - 25.2%] | 0.00           |
| sp.              | Leaf191    | 26.0 | [23.7 - 28.5%] | 0.02          | 25.9             | [23.5 - 28.3%] | 0.01           | 25.9 | [23.6 - 28.4%] | 0.02           | 25.9 | [23.6 - 28.4%] | 0.02           |
| sp.              | MR-57      | 22.8 | [20.5 - 25.2%] | 0.00          | 22.7             | [20.4 - 25.2%] | 0.00           | 22.9 | [20.6 - 25.3%] | 0.00           | 22.9 | [20.6 - 25.3%] | 0.00           |
| sp.              | NO-1       | 25.9 | [23.6 - 28.4%] | 0.02          | 26.0             | [23.7 - 28.5%] | 0.02           | 26.1 | [23.8 - 28.6%] | 0.02           | 26.2 | [23.8 - 28.6%] | 0.02           |
| sp.              | RAC01      | 25.5 | [23.2 - 28.0%] | 0.01          | 25.4             | [23.1 - 27.9%] | 0.01           | 25.7 | [23.4 - 28.2%] | 0.01           | 25.7 | [23.3 - 28.2%] | 0.01           |
| sp.              | Root70     | 25.8 | [23.5 - 28.3%] | 0.01          | 25.7             | [23.4 - 28.2%] | 0.01           | 25.8 | [23.5 - 28.3%] | 0.01           | 25.8 | [23.5 - 28.3%] | 0.01           |
| sp.              | Root217    | 25.2 | [22.8 - 27.6%] | 0.01          | 25.2             | [22.8 - 27.7%] | 0.01           | 25.3 | [23.0 - 27.8%] | 0.01           | 25.3 | [23.0 - 27.8%] | 0.01           |
| sp.              | Root219    | 25.2 | [22.9 - 27.7%] | 0.01          | 25.3             | [22.9 - 27.8%] | 0.01           | 25.4 | [23.0 - 27.8%] | 0.01           | 25.4 | [23.0 - 27.8%] | 0.01           |
| sp.              | Root267    | 25.8 | [23.5 - 28.3%] | 0.01          | 25.8             | [23.5 - 28.3%] | 0.01           | 25.9 | [23.6 - 28.4%] | 0.01           | 25.9 | [23.6 - 28.4%] | 0.01           |
| sp.              | Root275    | 25.9 | [23.6 - 28.4%] | 0.01          | 26.0             | [23.7 - 28.5%] | 0.02           | 26.1 | [23.7 - 28.6%] | 0.02           | 26.1 | [23.7 - 28.6%] | 0.02           |
| sp.              | Root402    | 25.7 | [23.4 - 28.2%] | 0.01          | 25.8             | [23.4 - 28.2%] | 0.01           | 25.8 | [23.5 - 28.3%] | 0.01           | 25.8 | [23.5 - 28.3%] | 0.01           |
| sp.              | Root568    | 25.9 | [23.6 - 28.4%] | 0.01          | 25.9             | [23.6 - 28.4%] | 0.01           | 25.8 | [23.5 - 28.3%] | 0.01           | 25.8 | [23.5 - 28.3%] | 0.01           |
| sp.              | SCN_65-28  | 25.2 | [22.8 - 27.6%] | 0.01          | 25.2             | [22.9 - 27.7%] | 0.01           | 25.4 | [23.1 - 27.9%] | 0.01           | 25.4 | [23.1 - 27.9%] | 0.01           |

| Species | Strain     | NA2  |                |                  | NA3 <sup>T</sup> |                |                   | P3   |                |                   | P4   |                |                   |
|---------|------------|------|----------------|------------------|------------------|----------------|-------------------|------|----------------|-------------------|------|----------------|-------------------|
|         |            | DDH  | Model C.I.     | Prob DDH<br>≥70% | DDH              | Model C.I.     | Prob. DDH<br>≥70% | DDH  | Model C.I.     | Prob. DDH<br>≥70% | DDH  | Model C.I.     | Prob. DDH<br>≥70% |
| sp.     | SCN_65-108 | 25.3 | [23.0 - 27.8%] | 0.01             | 25.1             | [22.8 - 27.6%] | 0.01              | 25.3 | [23.0 - 27.8%] | 0.01              | 25.3 | [23.0 - 27.8%] | 0.01              |
| sp.     | SCN_68-22  | 21.7 | [19.4 - 24.1%] | 0.00             | 22.0             | [19.7 - 24.4%] | 0.00              | 21.6 | [19.3 - 24.0%] | 0.00              | 21.6 | [19.4 - 24.0%] | 0.00              |
| sp.     | SD340      | 26.1 | [23.7 - 28.6%] | 0.02             | 25.9             | [23.6 - 28.4%] | 0.02              | 26.4 | [24.1 - 28.9%] | 0.02              | 26.4 | [24.1 - 28.9%] | 0.02              |

**Table A.2.** Average nucleotide identity (ANI) between *Acidovorax* strains from this study and characterized *Acidovorax* strains with publicly available genomic data, including strains without species designation.

| Species              | Strain                  | NA2  | NA3 <sup>T</sup> | P3   | P4   |
|----------------------|-------------------------|------|------------------|------|------|
| sp.                  | NA2                     | 100  | 96.9             | 97.1 | 97.1 |
| sp.                  | NA3 <sup>T</sup>        | 96.9 | 100              | 97.0 | 97.1 |
| sp.                  | P3                      | 97.1 | 97.0             | 100  | 100  |
| sp.                  | P4                      | 97.1 | 97.1             | 100  | 100  |
| <i>acенае</i>        | T10_61                  | 80.6 | 80.8             | 80.7 | 80.7 |
| <i>avenae</i>        | ATCC 19860 <sup>T</sup> | 80.8 | 80.7             | 80.8 | 80.8 |
| <i>acенае</i>        | RS-1                    | 80.7 | 80.7             | 80.7 | 80.8 |
| <i>caeni</i>         | R-24608 <sup>T</sup>    | 80.5 | 80.4             | 80.5 | 80.4 |
| <i>cattleyae</i>     | DSM 17101               | 80.7 | 80.5             | 80.7 | 80.7 |
| <i>citrulli</i>      | AAC00-1                 | 80.9 | 80.9             | 80.9 | 80.9 |
| <i>citrulli</i>      | DSM 17060               | 80.7 | 80.6             | 80.8 | 80.7 |
| <i>citrulli</i>      | M6                      | 80.8 | 80.8             | 80.9 | 80.8 |
| <i>citrulli</i>      | pslb65                  | 80.8 | 80.7             | 80.8 | 80.9 |
| <i>citrulli</i>      | tw6                     | 80.8 | 80.7             | 80.9 | 80.8 |
| <i>citrulli</i>      | ZJU1106                 | 81.7 | 81.7             | 81.8 | 81.8 |
| <i>delafieldii</i>   | 2AN                     | 85.6 | 85.6             | 85.7 | 85.6 |
| <i>delafieldii</i>   | CCH3-G3                 | 83.9 | 83.9             | 84.2 | 84.2 |
| <i>delafieldii</i>   | CCH4-A2                 | n.d. | n.d.             | n.d. | n.d. |
| <i>ebreus</i>        | TPSY                    | 81.1 | 81.2             | 81.0 | 81.1 |
| <i>konjaci</i>       | DSM 7481 <sup>T</sup>   | 80.3 | 80.5             | 80.4 | 80.4 |
| <i>oryzae</i>        | ATCC 19882 <sup>T</sup> | 80.6 | 80.8             | 80.7 | 80.8 |
| <i>radicis</i>       | N35 <sup>T</sup>        | 84.0 | 83.8             | 83.9 | 83.8 |
| <i>radicis</i>       | N35v                    | 83.9 | 83.8             | 83.8 | 83.8 |
| <i>solii</i>         | DSM 25157               | 87.4 | 87.3             | 87.6 | 87.6 |
| <i>temperans</i>     | KY4                     | 82.7 | 82.7             | 82.8 | 82.7 |
| <i>valerianellae</i> | DSM 16619               | 81.3 | 81.4             | 81.2 | 81.4 |
| <i>wautersii</i>     | DSM 27981               | 81.6 | 81.7             | 81.7 | 81.8 |
| sp.                  | 65-7                    | 83.5 | 83.6             | 83.6 | 83.6 |
| sp.                  | 12322-1                 | 78.1 | 78.1             | 78.2 | 78.1 |
| sp.                  | 121606                  | 78.1 | 78.1             | 78.1 | 78.2 |
| sp.                  | 202149                  | 78.2 | 78.2             | 78.2 | 78.2 |
| sp.                  | CCH12-A4                | 83.0 | 83.0             | 84.4 | 84.5 |
| sp.                  | CF316                   | 83.0 | 82.9             | 83.1 | 83.1 |
| sp.                  | GW101-3H11              | 83.7 | 83.7             | 83.8 | 83.8 |
| sp.                  | JHL-3                   | 88.0 | 88.0             | 88.1 | 88.1 |
| sp.                  | JHL-9                   | 88.0 | 87.9             | 87.9 | 87.9 |
| sp.                  | JS42                    | 82.0 | 82.0             | 83.2 | 83.2 |
| sp.                  | KKS102                  | 83.7 | 83.8             | 83.8 | 83.8 |
| sp.                  | Leaf76                  | 83.6 | 83.5             | 83.4 | 83.5 |
| sp.                  | Leaf78                  | 83.4 | 83.3             | 83.4 | 83.3 |
| sp.                  | Leaf84                  | 83.5 | 83.4             | 83.4 | 83.5 |
| sp.                  | Leaf160                 | 81.3 | 81.3             | 81.4 | 81.3 |
| sp.                  | Leaf191                 | 83.4 | 83.4             | 83.5 | 83.5 |
| sp.                  | MR-S7                   | 80.8 | 81.0             | 81.0 | 81.0 |
| sp.                  | NO-1                    | 84.1 | 84.0             | 84.2 | 84.2 |
| sp.                  | RAC01                   | 83.7 | 83.4             | 83.7 | 83.6 |
| sp.                  | Root70                  | 83.6 | 83.6             | 83.7 | 83.7 |
| sp.                  | Root217                 | 83.0 | 83.1             | 83.1 | 83.1 |
| sp.                  | Root219                 | 82.9 | 82.9             | 83.0 | 83.1 |
| sp.                  | Root267                 | 83.9 | 83.9             | 83.9 | 83.9 |
| sp.                  | Root275                 | 83.9 | 83.9             | 84.0 | 84.0 |
| sp.                  | Root402                 | 83.8 | 83.7             | 83.8 | 83.8 |
| sp.                  | Root568                 | 83.9 | 83.7             | 83.7 | 83.7 |
| sp.                  | SCN_65-28               | 83.0 | 83.0             | 83.2 | 83.2 |
| sp.                  | SCN_65-108              | 83.4 | 83.2             | 83.3 | 83.3 |
| sp.                  | SCN_68-22               | 80.2 | 80.8             | 80.3 | 80.3 |
| sp.                  | SD340                   | 83.8 | 83.8             | 84.0 | 84.0 |

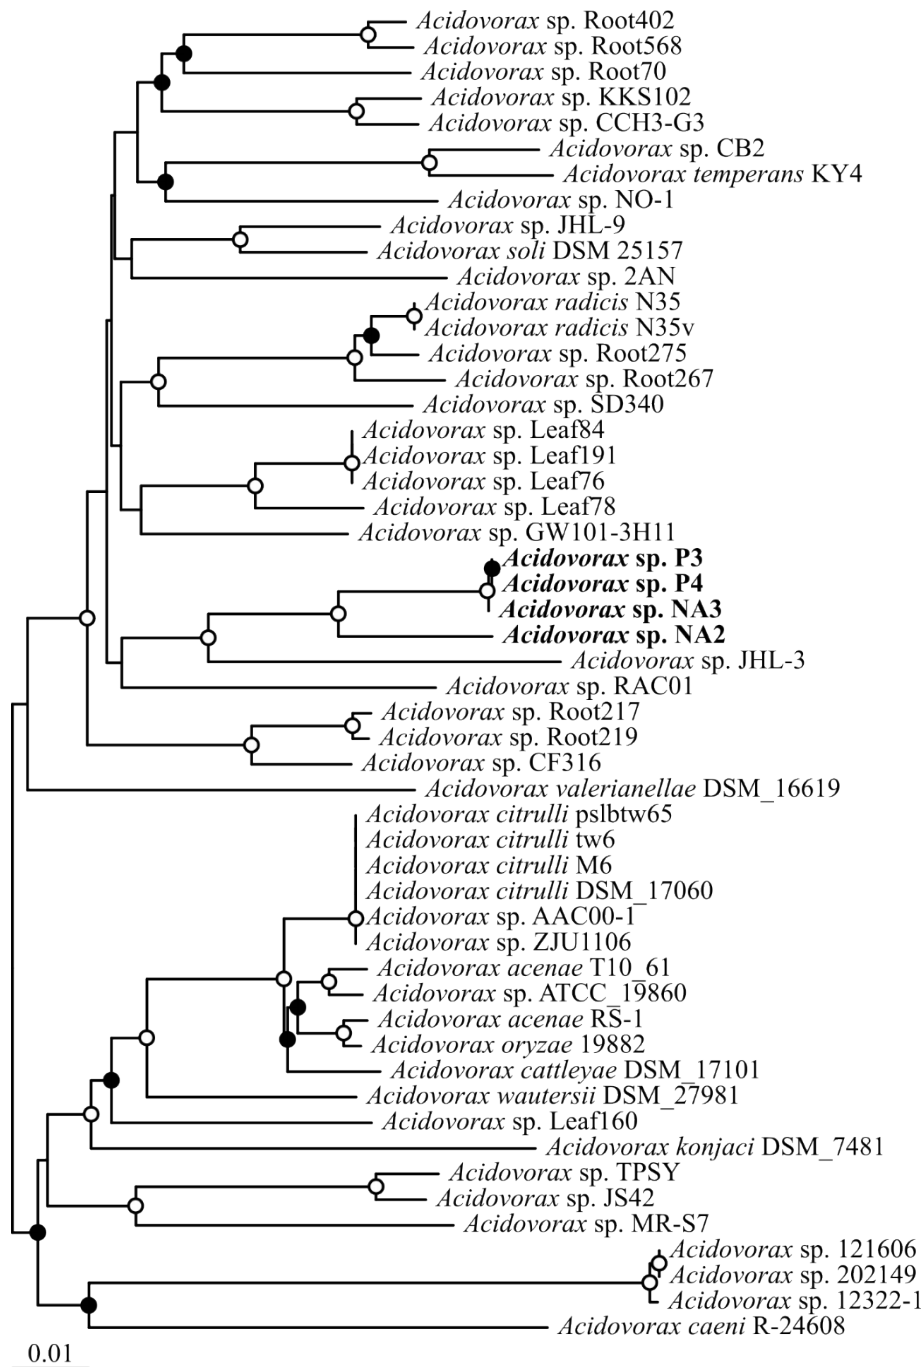

**Figure A.1.** Neighbor-joining phylogenetic tree of *Acidovorax* strains based on the *rpoB* gene. Sequences were identified based on blastn searches of genomes using the NA3<sup>T</sup> annotated-*rpoB* gene nucleotide sequence. Open and closed circles at nodes indicate >95 and >50% bootstrap support, respectively (1000 iterations). *Variovorax paradoxus* strain EPS was used as an outgroup (not shown).

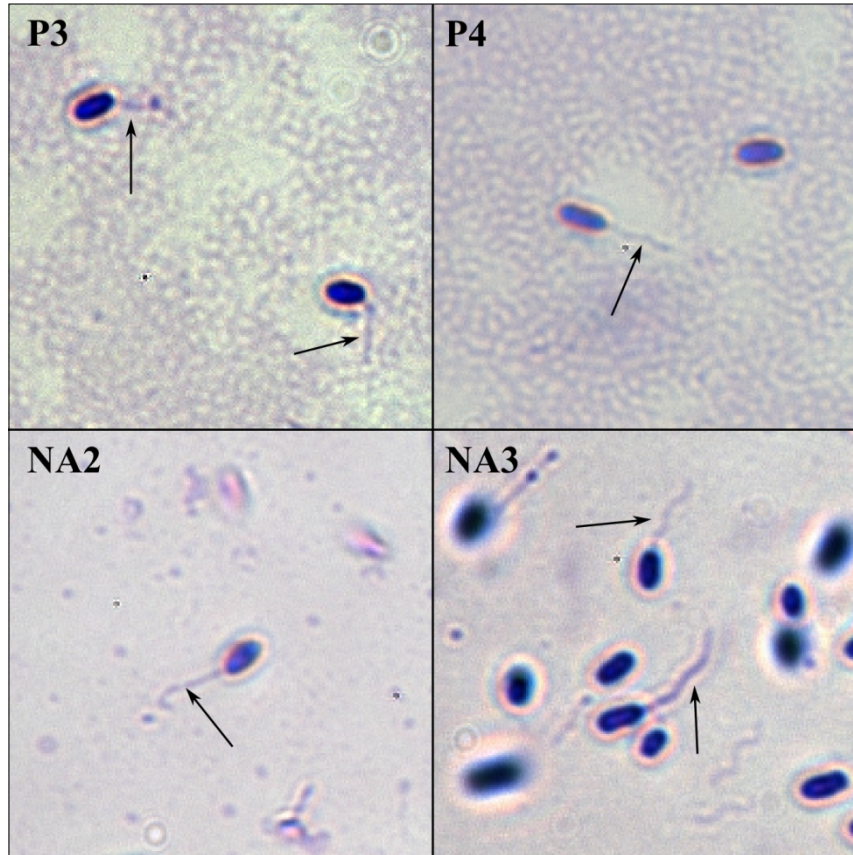

**Figure A.2.** Flagella-stained cells of described *Acidovorax* strains acquired using light microscopy. Cell-attached flagella are indicated in each panel with arrows.

**Fig. A.3.** Mauve alignment of *Acidovorax* chromosomes from this study – (1) *Acidovorax* sp. NA3<sup>T</sup>, (2) *Acidovorax* sp. NA2, (3) *Acidovorax* sp. P3, reversed, and (4) *Acidovorax* sp. P4. Colored blocks indicate regions of high similarity, arrangement, and homology. Letters (a) and (b) indicate blocks specific to strains NA2/NA3<sup>T</sup> and P3/P4, respectively. Numbers above alignments indicate position on the chromosome. Blocks below the center line indicate inversions with respect to homologous regions of other chromosomes.

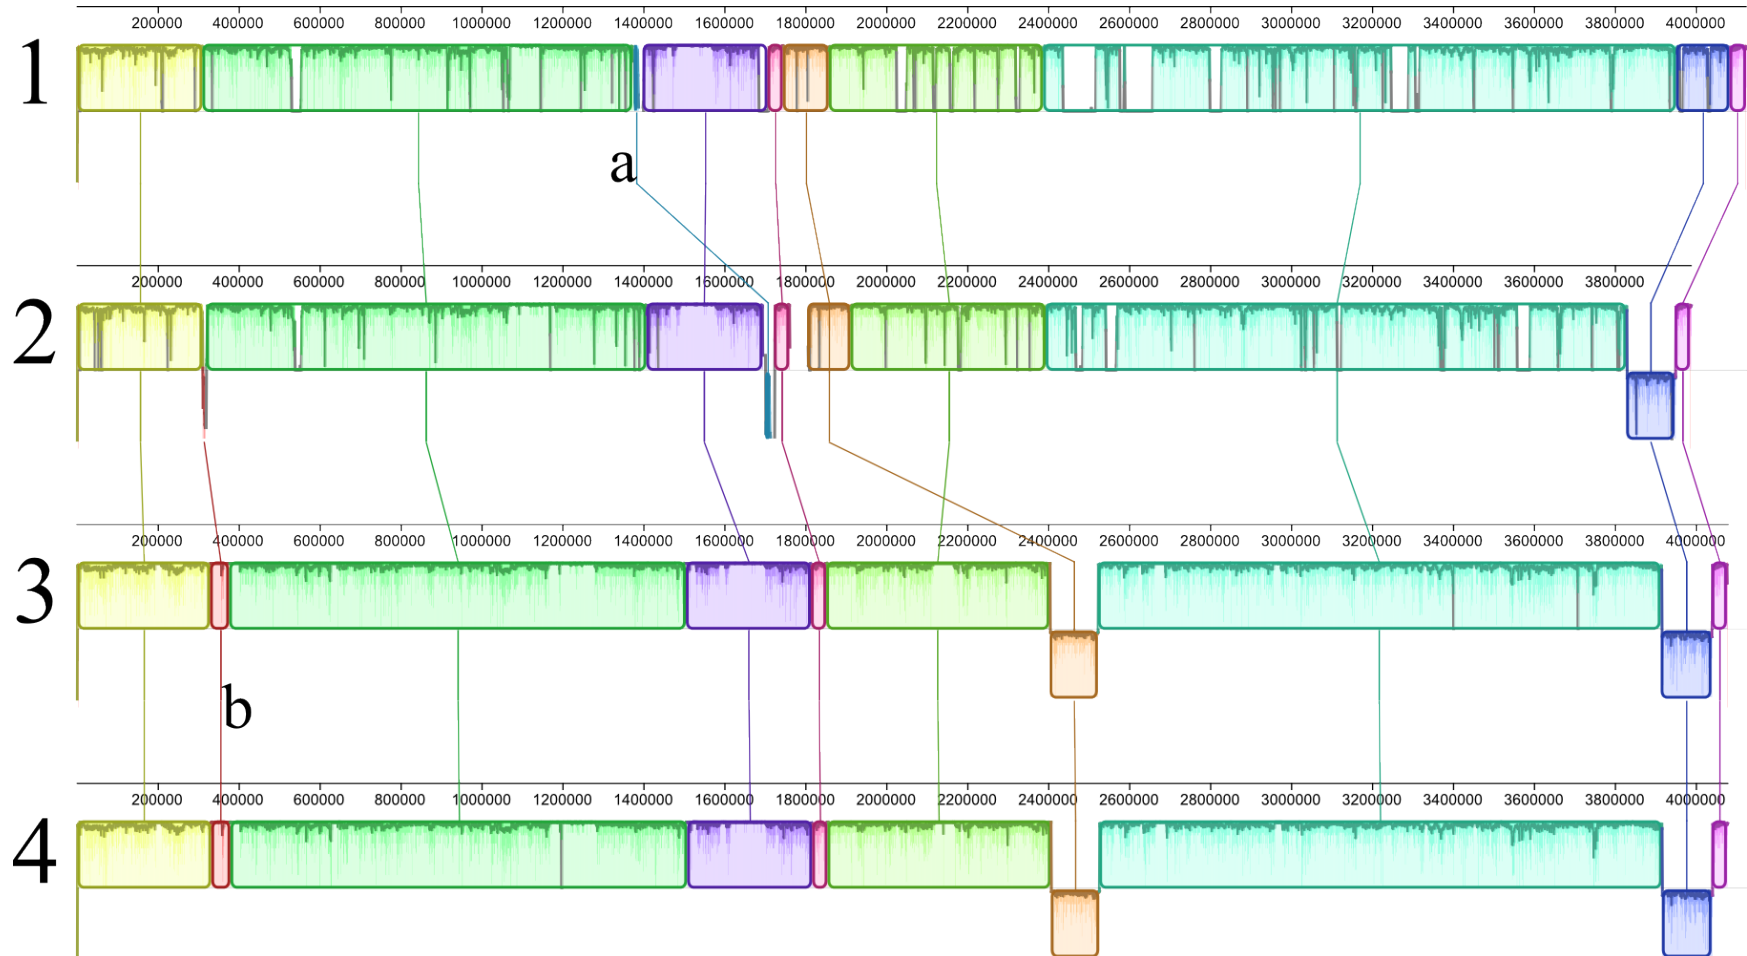



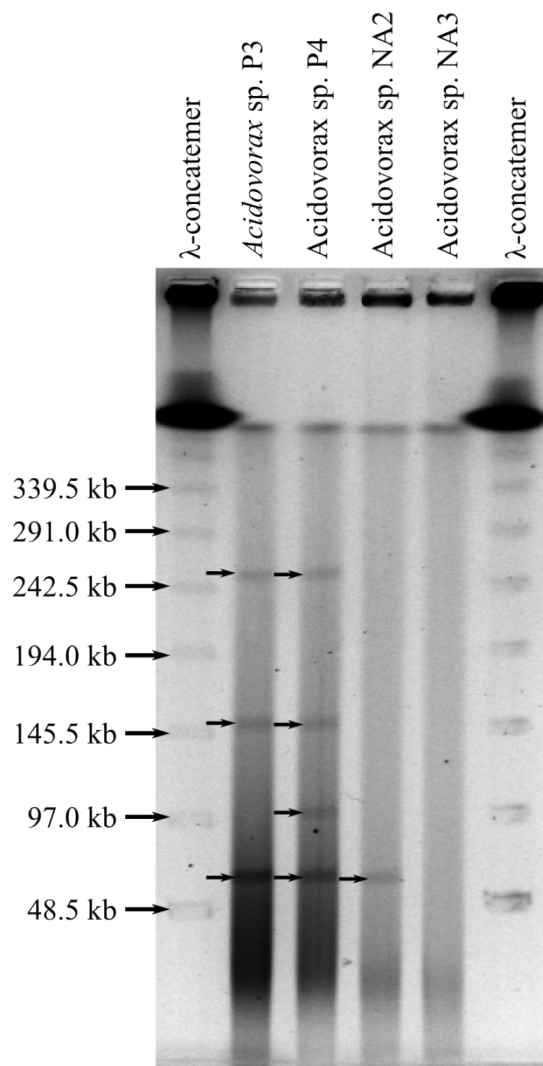

**Figure A.4.** PFGE image showing presence of extrachromosomal elements in described *Acidovorax* strains. Lambda concatemer marker sizes are shown on the left side of the gel and putative plasmids within each strain are indicated with arrows. The gel image was inverted in color and levels adjusted for best display quality using the GNU Image Manipulation Program ver. 2.8.
